# Supplementary material
Source: Springer Nature journal article supplement (https://www.springermedizin.de/resource/supplementary/12885_2014_4793_MOESM6_ESM.pdf/9467288)

# SK-N-AS

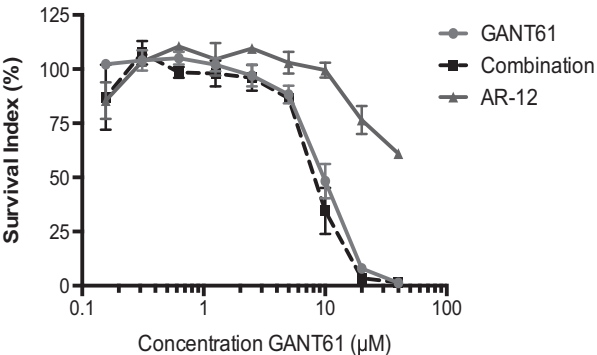

# SK-N-BE(2)

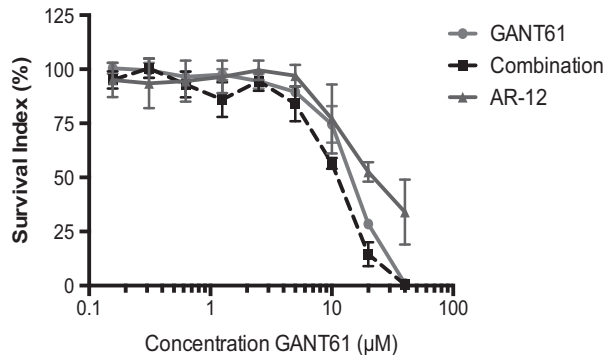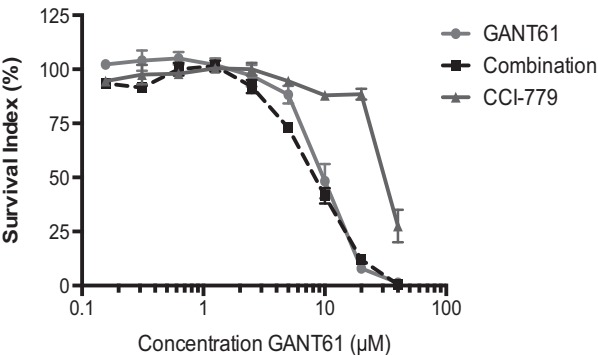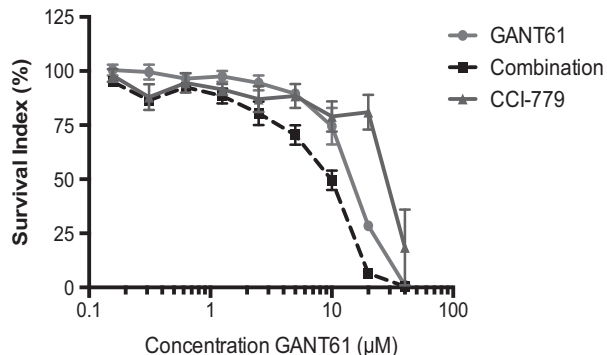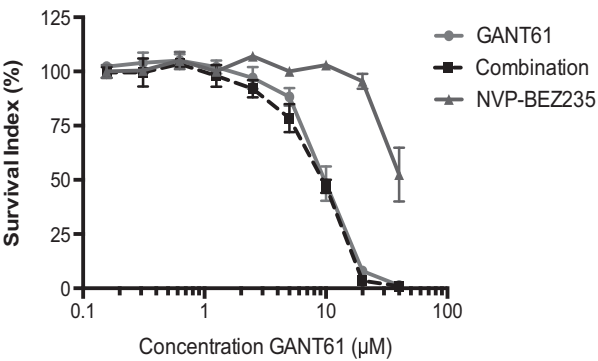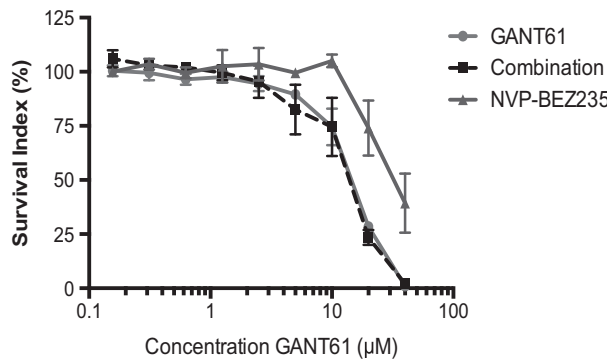

Supplement: MOESM6 [file 9467288]
